# Supplementary material for: Nanomaterials for managing abiotic and biotic stress in the soil–plant system for sustainable agriculture
Source: Royal Society of Chemistry journal article supplement (doi:10.1039/d4en00789a), 2024-11-27
Supplement: d4en00789a1.pdf [file d4en00789a1.pdf]

**Table1. Summary of different nanomaterials for mitigating abiotic stress.**

| NM                                               | Conc.                                                                   | Crop/s                                   | Apl.       | Abiotic stress | Effect/s                                                                                                                                          | Ref. |
|--------------------------------------------------|-------------------------------------------------------------------------|------------------------------------------|------------|----------------|---------------------------------------------------------------------------------------------------------------------------------------------------|------|
| <b>Ag</b>                                        | 0, 25, 50, 75 & 100 mg/L                                                | <i>Triticum aestivum</i> L.              | Soil       | High temp.     | Improved plant yield & growth.                                                                                                                    | 1    |
| <b>Se</b>                                        | 10 mg/L                                                                 | <i>Sorghum bicolor</i> L. Moench         | Foliar     | High temp.     | Enhanced antioxidant defense system, unsaturated phospholipids, pollen germination & seed yield.                                                  | 2    |
| <b>ZnO</b>                                       | 0, 15, 30, 45 & 60 mg/L                                                 | <i>Vigna radiata</i> L.                  | Foliar     | High temp.     | Increased chlorophyll, gas exchange & grain yield                                                                                                 | 3    |
| <b>MWCN Ts &amp; TiO<sub>2</sub></b>             | 10 mg of TiO <sub>2</sub> , 0, 10 & 15% TiO <sub>2</sub> + MWCNTs       | <i>Sesamum indicum</i> L.                | Foliar     | High temp.     | At different combinations & concentrations reduced H <sub>2</sub> O <sub>2</sub> -. Increased oil content, unsaturated fatty acids &, seed yield. | 4    |
| <b>SiO<sub>2</sub>, ZnO, Se, &amp; Graphe ne</b> | 300 ppm (SiO <sub>2</sub> ), 50 ppm (ZnO), 15 ppm (Se) &, 50 ppm (GNRs) | <i>Saccharum officinarum</i> L.          | Foliar     | Cold           | Enhanced photochemical efficiency of PSII, Photo-oxidizable PSI & photosynthetic gas exchange, chlorophylls, & carotenoids.                       | 5    |
| <b>TiO<sub>2</sub></b>                           | 0 & 5 mg/L                                                              | <i>Cicer arietinum</i> L.                | Foliar     | Cold           | Reduced oxidative stress, electrolyte leakage index, & increased productivity.                                                                    | 6    |
| <b>TiO<sub>2</sub></b>                           | 0, 2 & 5 ppm                                                            | <i>Glycyrrhiza glabra</i> L.             | MS medium  | Cold           | Decreased MDA & H <sub>2</sub> O <sub>2</sub> contents.                                                                                           | 7    |
| <b>Mn</b>                                        | 0, 0.1, 0.5 & 1.0 mg/L                                                  | <i>Capsicum annum</i> L.                 | Seed       | Salinity       | Enhanced root elongation & germination.                                                                                                           | 8    |
| <b>Se</b>                                        | 0, 10 & 20 mg/L                                                         | <i>Fragaria x ananassa</i> Duch.         | Foliar     | Salinity       | Improved growth, yield, quality, & fruit nutritional value. Reduced LP & H <sub>2</sub> O <sub>2</sub> . Accumulated IAA, & ABA.                  | 9    |
| <b>MWCN Ts</b>                                   | 0, 10, 20, 40 & 60 mg/L                                                 | <i>Brassica oleracea</i> L. var. Italica | Hydroponic | Salinity       | Improved photosynthesis, water uptake, rigidity & permeability of roots & plasma membrane.                                                        | 10   |

|                                |                                                                                   |                                                                   |            |          |                                                                                                                                                             |    |
|--------------------------------|-----------------------------------------------------------------------------------|-------------------------------------------------------------------|------------|----------|-------------------------------------------------------------------------------------------------------------------------------------------------------------|----|
| <b>MWCN<br/>Ts</b>             | 20 mg/L                                                                           | <i>Brassica napus</i><br>L.                                       | MS medium  | Salinity | Reduced ROS, thiobarbituric acid reactive substance production, & Na <sup>+</sup> /K <sup>+</sup> ratio.                                                    | 11 |
| <b>MWCN<br/>Ts-<br/>COOH</b>   | 0, 25, 50 &<br>100 mg/L                                                           | <i>Ocimum<br/>basilicum</i> L.                                    | Hydroponic | Salinity | Increased chlorophyll, carotenoids, growth, essential oil content &, induced enzymatic & non-enzymatic antioxidants.                                        | 12 |
| <b>CeO</b>                     | 0 & 500<br>mg/L                                                                   | <i>Gossypium<br/>hirsutum</i> L.                                  | Seed       | Salinity | Decreased ROS in roots, & increased root growth.                                                                                                            | 13 |
| <b>ZnO &amp;<br/>Si</b>        | 0, 100 &<br>150 (ZnO)<br>& 0, 150 &<br>300 (Si)                                   | <i>Mangifera<br/>indica</i> L. Ewais                              | Foliar     | Salinity | Increased growth, nutrient uptake, carbon assimilation, & reduced malformation of flowers.                                                                  | 14 |
| <b>FeO</b>                     | 0, 30, 60, &<br>90 ppm                                                            | <i>Dracocephalum<br/>moldavica</i> L.                             | Foliar     | Salinity | Increased leaf area, enzyme activities, & antioxidant defense.                                                                                              | 15 |
| <b>ZnO</b>                     | 10 mg/L                                                                           | <i>Abelmoschus<br/>esculentus</i> L.<br>Moench cv.<br>Hasawi      | Foliar     | Salinity | Increased photosynthetic pigment &, CAT & SOD activity. Decreased proline & total soluble sugars.                                                           | 16 |
| <b>Graphene &amp;<br/>CNTs</b> | 0, 50, 100,<br>200, 500,<br>1000<br>(graphene)<br>& 0, 50, 200<br>µg/ml<br>(CNTs) | <i>Gossypium<br/>hirsutum</i> &<br><i>Catharanthus<br/>roseus</i> | Seed       | Salinity | In vinca plants, increased flower & leaf quantity, & increased fiber biomass in cotton.                                                                     | 17 |
| <b>Cit-Ag</b>                  | 1mM                                                                               | <i>Zea mays</i> L.                                                | Foliar     | Salinity | Improved photosynthesis, dry weight, total osmolytes, SOD & POD.                                                                                            | 18 |
| <b>Ca</b>                      | 0, 2.5, 5, 10,<br>15, 20 mM                                                       | <i>Solanum<br/>lycopersicon</i> L.                                | Irrigation | Salinity | Improved survival, anabolic, growth, enzymatic antioxidant activities & osmolytes accumulation.                                                             | 19 |
| <b>ZnO</b>                     | 0, 15, & 30<br>mg/L                                                               | <i>Fragaria x<br/>ananassa</i> Duch.<br>& Camarosa                | In-vitro   | Salinity | Increased CAT, POD, & proline content. Decreased build-up of toxic ions Na <sup>+</sup> & Cl <sup>-</sup> as well as Na <sup>+</sup> /K <sup>+</sup> ratio. | 20 |

|                                                 |                                                                                                                              |                                      |          |          |                                                                                                                                                                                    |    |
|-------------------------------------------------|------------------------------------------------------------------------------------------------------------------------------|--------------------------------------|----------|----------|------------------------------------------------------------------------------------------------------------------------------------------------------------------------------------|----|
| <b>ZnO proline doped</b>                        | 0, 50, & 100 mg/L                                                                                                            | <i>Coriandrum sativum</i>            | In-vitro | Salinity | Decreased antioxidant, phytochemical activities, SOD & POD. Increased plant weight.                                                                                                | 21 |
| <b>ZnOBt</b>                                    | 0, 50, & 100 mg/L                                                                                                            | <i>Coriandrum sativum</i>            | In-vitro | Salinity | Increased root & shoot length, plant weight. Decreased SOD & POD.                                                                                                                  | 22 |
| <b>Si</b>                                       | 20 mg/L                                                                                                                      | Rice (N-22 and Super-Bas)            | Foliar   | Salinity | Stimulated growth, chlorophyll, carotenoids, total soluble protein, & POD and HKT genes were upregulated.                                                                          | 23 |
| <b>Si</b>                                       | 75 mg/kg                                                                                                                     | <i>Zea mays</i> L.                   | Soil     | Salinity | Increased dry weight, chlorophyll content, transpiration, stomatal conductance, internal CO <sub>2</sub> concentration &, availability of nutrients.                               | 24 |
| <b>CeO<sub>2</sub> &amp; CeO<sub>2</sub>-SA</b> | 0, 100 μM (SA), 50 mg/L (CeO <sub>2</sub> ), 25 mg/L + 50 μM (CeO <sub>2</sub> -SA), 50 mg/L + 100 μM (CeO <sub>2</sub> -SA) | <i>Mentha spicata</i> L.             | Foliar   | Salinity | Improved protein, carbohydrate, phenolics, total antioxidant capacity, flavonoids, & essential oil percentage. Decreased proline, GPX, H <sub>2</sub> O <sub>2</sub> , APX &, SOD. | 25 |
| <b>Se-CS</b>                                    | 0, 10 & 20 mg/L                                                                                                              | <i>Momordica charantia</i>           | Seed     | Salinity | Increased photosynthesis, antioxidant enzymatic activity & nutrient homeostasis.                                                                                                   | 26 |
| <b>GO &amp; GO-Pro</b>                          | 0, 50, 100 mg/L                                                                                                              | <i>Vitis vinifera</i> L. cv Vitaceae | Foliar   | Salinity | Reduced H <sub>2</sub> O <sub>2</sub> , MDA, & electrolyte leakage, & increased proline.                                                                                           | 27 |
| <b>SiO<sub>2</sub></b>                          | 0, 10, 50 & 100 mg/L                                                                                                         | <i>Crataegus</i> sp.                 | Soil     | Drought  | Increased plant biomass, xylem water potential & malondialdehyde.                                                                                                                  | 28 |
| <b>SWCN Ts</b>                                  | 0, 50, 100, 200, 400 & 800 μg/mL                                                                                             | <i>Hyoscyamus niger</i>              | seed     | Drought  | Increased water uptake, germination, & seedling vigor index. Decreased H <sub>2</sub> O <sub>2</sub> , MDA & electrolyte leakage.                                                  | 29 |

|                                    |                                         |                                                           |             |         |                                                                                                                                                            |    |
|------------------------------------|-----------------------------------------|-----------------------------------------------------------|-------------|---------|------------------------------------------------------------------------------------------------------------------------------------------------------------|----|
| <b>Graphene &amp; CNTs</b>         | 0, 50 200<br>µg/ml<br>(graphene & CNTs) | <i>Gossypium hirsutum</i> &<br><i>Catharanthus roseus</i> | Seed        | Drought | Increased plant survival & no symptoms of drought stress.                                                                                                  | 17 |
| <b>(GSNO-CS-NP)</b>                | 100 µM                                  | Sugarcane                                                 | Foliar      | Drought | Increased drought tolerance, root & shoot ratio.                                                                                                           | 30 |
| <b>TiO<sub>2</sub></b>             | 0, 500, 1000<br>& 2000<br>mg/kg         | <i>Triticum aestivum</i>                                  | Soil/foliar | Drought | Improved seedling dry weight, RWC, CAT, APX, proline, total chlorophyll, carotenoids, stomatal conductance, & transpiration.                               | 31 |
| <b>Chitosan (CSNP)</b>             | 1%                                      | <i>Catharanthus roseus</i>                                | Foliar      | Drought | Promoted proline accumulation, CAT, APX, & reduced H <sub>2</sub> O <sub>2</sub> & MDA.                                                                    | 32 |
| <b>Fe<sub>2</sub>O<sub>3</sub></b> | 0, 5, 10, 20,<br>30 & 40 µM             | <i>Vitis vinifera</i> L.                                  | Root        | Drought | Improved AsA-, GSH-, & CAT.                                                                                                                                | 33 |
| <b>ZnO</b>                         | 0, 75, 100,<br>125 & 150<br>mg/L        | <i>Curcumis melo</i> L.                                   | Hydroponic  | Drought | Improved SOD, POD, CAT, APX, DREB2D, & DREB3, soluble sugar, protein, & chlorophyll.                                                                       | 34 |
| <b>SiO<sub>2</sub></b>             | 50 mg/L                                 | <i>Fragaria X ananassa</i> Duch.                          | Foliar      | Drought | Increased osmolytes proline, total soluble sugar, chlorophylls, & carotenoids. Up regulated some responsive genes which modified ABA & phenolic compounds. | 35 |
| <b>Ag</b>                          | 0, 40, 80 &<br>120 ppm                  | <i>Crocus sativus</i> L.                                  | Root        | Flood   | Increased leaves dry weight, root number & length.                                                                                                         | 36 |
| <b>Al<sub>2</sub>O<sub>3</sub></b> | 0, 5, 50, 500<br>ppm                    | <i>Glycine max</i> L.                                     | Solution    | Flood   | Enhanced seedling growth. Reduced cytotoxic byproducts of glycolysis.                                                                                      | 37 |
| <b>Ag</b>                          | 5 ppm (2, 15<br>& 50-80<br>nm)          | <i>Glycine max</i> L.<br>cv. Enrei                        | Solution    | Flood   | Increased root size & amino acid synthesis related proteins.                                                                                               | 38 |
| <b>Ag</b>                          | 5 ppm                                   | <i>Glycine max</i> L.                                     | Solution    | Flood   | Enhanced growth, length, & weight. Increased accumulation of calnexin/calreticulin & glycoproteins                                                         | 39 |

|                              |                                                                     |                                                                                |                   |       |                                                                                                                       |    |
|------------------------------|---------------------------------------------------------------------|--------------------------------------------------------------------------------|-------------------|-------|-----------------------------------------------------------------------------------------------------------------------|----|
| <b>SiO<sub>2</sub></b>       | 250 mg/L                                                            | <i>Poncirus trifoliata</i> L.,<br><i>Poncirus trifoliata</i> L. &<br>Rich 16-6 | Root/Foliar       | Flood | Increase biomass, photosynthesis, growth, polyamine metabolism & reduced ROS.                                         | 40 |
| <b>Si</b>                    | 10 µM                                                               | <i>Triticum aestivum</i>                                                       | Hydroponic        | UV-B  | Enhanced antioxidants, lowered ROS & protected photosynthesis.                                                        | 41 |
| <b>TiO<sub>2</sub></b>       | 0, 25 & 50 mg/L                                                     | <i>Crocus sativus</i> L.                                                       | Foliar            | UV-B  | Increased yield & nutritional value.                                                                                  | 42 |
| <b>Ag</b>                    | 0, 50 & 100 mg/L                                                    | <i>Thymus vulgaris</i> L.                                                      | Foliar            | UV-B  | Improved plant growth yield.                                                                                          | 43 |
| <b>ZnO</b>                   | 0, 25, 50, 75 & 100 mg/kg (soil), 0, 25, 50, 75 & 100 mg/L (foliar) | <i>Triticum aestivum</i>                                                       | Soil/foliar       | Metal | Increased growth, photosynthesis, grain yield, Zn content, & reduced electrolyte leakage & Cd toxicity.               | 44 |
| <b>Fe</b>                    | 0, 5, 10, 15 & 20 mg/kg (soil), 0, 5, 10, 15 & 20 ppm (foliar)      | <i>Triticum aestivum</i>                                                       | Foliar & Soil     | Metal | Reduced Cd toxic effects & enhanced Fe biofortification. Improved morphological parameters, photosynthesis, & growth. | 45 |
| <b>SiO<sub>2</sub></b>       | 1%, 3%, 5%, 10%, 15% & 20%                                          | <i>Cicer arietinum</i>                                                         | Germination paper | Metal | Enhanced antioxidant genes & reduced cytotoxicity of LP & provided tolerance against Al-toxicity.                     | 46 |
| <b>TiO<sub>2</sub></b>       | 0, 100 & 250 mg/L                                                   | <i>Zea mays</i> L.                                                             | Foliar            | Metal | Decreased Cd content in plants & increased SOD, GST.                                                                  | 47 |
| <b>ZnO and Biochar (ZnO)</b> | 0, 50, 75 & 100 mg/L (ZnO), 1.0% w/w (biochar)                      | <i>Zea mays</i> L.                                                             | Foliar            | Metal | Increased biomass, Zn content, enzymatic activity, and decreased oxidative stress & Cd accumulation.                  | 48 |

|                                      |                                                 |                                         |                  |           |                                                                                                                                                           |    |
|--------------------------------------|-------------------------------------------------|-----------------------------------------|------------------|-----------|-----------------------------------------------------------------------------------------------------------------------------------------------------------|----|
| <b>ZnO</b>                           | 25 mg/L                                         | <i>Oryza sativa</i> L.                  | Hydroponic       | Metal     | Decreased Cd accumulation. Improved growth & antioxidant enzymatic activity.                                                                              | 49 |
| <b>Si+TM</b>                         | 10 mL suspension at 2% & 3%                     | <i>Solanum lycopersicum</i> L.          | Soil             | Metal     | Decreased Cd bioavailability & translocation. Increased Cd tolerance, plant growth & antioxidant enzymatic activity.                                      | 50 |
| <b>CeO<sub>2</sub></b>               | 0, 200, 400 & 600 mg/L                          | <i>Abelmoschus esculentus</i> L. Moench | Foliar           | Metal     | Increased chlorophyll & carotenoids. Modulation in stress enzymatic activity of APX, GPx, & SOD.                                                          | 51 |
| <b>Put-CQD</b>                       | 25 & 50 mg/L                                    | <i>Vitis vinifera</i> cv. Sultana       | Foliar           | Metal     | Reduced Cd content in plant tissues. Increased fresh & dry weight in plant tissue.                                                                        | 52 |
| <b>ZnO</b>                           | 10 ppm                                          | <i>Zea mays</i> L. vr. CZP 312001       | <i>in-silico</i> | Metal     | Improved Zn, Cu, Na, Fe, K, Ca, & Mg uptake, biomass, chlorophyll <i>a</i> , <i>b</i> & carotenoids protein interactors regulation. Reduced Cd in shoots. | 53 |
| <b>SiO<sub>2</sub></b>               | 400 mg/L                                        | <i>Brassica napus</i> L.                | Seed             | Metal     | Improved photosynthesis & plant immunity. Reduced Cr accumulation, MDA, H <sub>2</sub> O <sub>2</sub> , & O <sub>2</sub> <sup>-</sup> .                   | 54 |
| <b>α-Fe<sub>2</sub>O<sub>3</sub></b> | 50 mg/kg                                        | <i>Cucumis melo</i> L.                  | Seedling         | Metal     | Decreased Cd toxicity, SOD, CAT and downregulated the expression of DEGs. Increased photosystem I & activated auxin-responsive genes.                     | 55 |
| <b>Si &amp; TiO<sub>2</sub></b>      | 0, 5, 10, 20 & 30 mg/L (Si & TiO <sub>2</sub> ) | <i>Oryza sativa</i> L.                  | Foliar           | Metal     | Enhanced growth & mitigated the Cd translocation.                                                                                                         | 56 |
| <b>S</b>                             | 0 & 300 mg/L                                    | <i>Brassica napus</i> L.                | MS medium        | Metal     | Alleviated Hg toxicity in <i>Brassica napus</i> L., increased dry weight, and the uptake of macro- and micro-nutrients.                                   | 57 |
| <b>ZnO</b>                           | 0, 25, 50, 100, 150 & 200 mg/L (50 seeds)       | <i>Vigna mungo</i> L. Hepper            | Seed priming     | Metalloid | Increased seed germination & plant growth. Decreased ROS build up, & As translocation to root & shoot.                                                    | 58 |
| <b>ZnO</b>                           | 20% w/t                                         | <i>Coffea arabica</i>                   | Foliar           | Nutrient  | Increased dry & fresh weight,                                                                                                                             | 59 |

|                                                                                        |                                               |                                                 |                    |                                  |                                                                                                                                                                |    |
|----------------------------------------------------------------------------------------|-----------------------------------------------|-------------------------------------------------|--------------------|----------------------------------|----------------------------------------------------------------------------------------------------------------------------------------------------------------|----|
|                                                                                        |                                               | L.                                              |                    | deficient                        | photosynthetic rate & Zn content.                                                                                                                              |    |
| <b>ZnO</b>                                                                             | 0, 10, 20,<br>50, 100, 200<br>& 1000<br>mg/kg | <i>Triticum<br/>aestivum</i> L.                 | Soil               | Nutrient<br>deficient            | Increased Zn content ingrain, grain yield & biomass.                                                                                                           | 60 |
| <b>ZVI,<br/>Fe<sub>3</sub>O<sub>4</sub>,<br/>&amp;<br/>Fe<sub>2</sub>O<sub>3</sub></b> | 0, 50, 250 &<br>500 mg/L<br>(Fe-based)        | <i>Oryza sativa</i> L.                          | Kimura<br>solution | Nutrient<br>deficient            | Increased Fe & chlorophyll & reduced stress-related phytohormones.                                                                                             | 61 |
| <b>Zn &amp;<br/>Mg-<br/>doped<br/>hydrox<br/>ypatite</b>                               | 0, 50%,<br>75% &<br>100%                      | <i>Triticum<br/>aestivum</i> L.                 | Soil               | Nutrient<br>deficient            | Served as a multi-nutrient complex that includes N, Ca, P, Mg, & Zn. Mitigated ammonia emissions, enhanced soil dehydrogenase, urease enzyme levels, & height. | 62 |
| <b>Cu</b>                                                                              | 0, 100 &<br>1000 mg/L                         | <i>Hordeum<br/>vulgare</i> L.                   | Foliar             | Nutrient<br>deficient            | Improved pigment, biomass, GSH content, & stress tolerance.                                                                                                    | 63 |
| <b>NZVI</b>                                                                            | 0, 1, 2, 5 &<br>10 g/kg                       | -                                               | Soil               | Problem<br>soils/<br>antibiotics | Degradation of TC in soil.                                                                                                                                     | 64 |
| <b>Chitosa<br/>n with<br/>N-<br/>Acetyl<br/>cysteine</b>                               | 0.5 mg/ml +<br>0.05%                          | <i>Triticum durum</i>                           | Foliar             | Ozone                            | Increased leaf antioxidant & weight of 1000 seeds.                                                                                                             | 65 |
| <b>Ag</b>                                                                              | 25 mg/L &<br>50 mg/L                          | <i>Triticum<br/>aestivum</i> L.                 | Foliar             | Ozone                            | Enhanced ozone tolerance, & increased yield, & weight.                                                                                                         | 66 |
| <b>CeO<sub>2</sub></b>                                                                 | 0, 200, 400,<br>600 & 1000<br>mg/kg           | Wheat                                           | Soil               | Metal &<br>alkalinity            | Decreased Cd availability in soil, & accumulation in all plant organs. Increased dry weight, grain yield & plant physiology.                                   | 67 |
| <b>Si</b>                                                                              | 0, 2.5 & 5.0<br>mmol/L (20,<br>30 & 40 days   | <i>Phaseolus<br/>vulgaris</i> L., cv.<br>Bronco | Foliar             | Metal &<br>salinity              | Saline soil contaminated with Cd, Pb, & Ni was mitigated by enhancing enzymatic & non-enzymatic antioxidants. Increased                                        | 68 |

|            | after sowing          |                                       |                     |                                                          | growth yield.                                                                                                                                                                                                                                                                                                                                                                                                                               |    |
|------------|-----------------------|---------------------------------------|---------------------|----------------------------------------------------------|---------------------------------------------------------------------------------------------------------------------------------------------------------------------------------------------------------------------------------------------------------------------------------------------------------------------------------------------------------------------------------------------------------------------------------------------|----|
| <b>Fe</b>  | 0, 25, 50 & 100 mg/kg | Wheat                                 | Soil                | Metal & Drought                                          | Increased growth & photosynthesis in plant & Fe concentrations in grain. Decreased Cd content, ROS, & drought stress.                                                                                                                                                                                                                                                                                                                       | 69 |
| <b>ZnO</b> | 0, 50 & 200 mg/L      | <i>Oryza sativa</i> L.                | Hydroponic & Foliar | High temp. & osmotic                                     | Increased ROS & H <sub>2</sub> O <sub>2</sub> . Up-regulated defense-related genes, OsNAC4, OsPR10, OsKSL4, & OsPR1b.                                                                                                                                                                                                                                                                                                                       | 70 |
| <b>CaP</b> | 30 mg/L (foliar),     | <i>Persea americana</i> Mill cv. Hass | Foliar & Soil       | High temp. & drought                                     | Reduced water stress & increased resistance to heat.                                                                                                                                                                                                                                                                                                                                                                                        | 71 |
| <b>Ag</b>  | 40 mg/L               | <i>Zea mays</i> L.                    | Seed priming        | Cold Salinity Drought Cold & Salinity Salinity & Drought | Increased germination speed, seedling vigor, shoot & root length &, dry weight.<br>Increased germination rate & seed vigor, root length, & dry weight.<br>Increased germination rate, seedling vigor, root length &, dry weight.<br>Increased seedling vigor, root length, & dry weight.<br>Increased germination percentage, seedling vigor, & root length.<br>Increased germination rate, seedling vigor, cold root length &, dry weight. | 72 |

1. M. Iqbal, N. I. Raja, Z. U. R. Mashwani, M. Hussain, M. Ejaz and F. Yasmeen, Effect of Silver Nanoparticles on Growth of Wheat Under Heat Stress, *Iran J Sci Technol Trans A Sci*, 2017, **43**, 387–395.
2. M. Djanaguiraman, N. Belliraj, S. H. Bossmann and P. V. V. Prasad, High-Temperature Stress Alleviation by Selenium Nanoparticle Treatment in Grain Sorghum, *ACS Omega*, 2018, **3**, 2479–2491.
3. H. A. Kareem, M. F. Saleem, S. Saleem, S. A. Rather, S. H. Wani, M. H. Siddiqui, S. Alamri, R. Kumar, N. B. Gaikwad, Z. Guo, J. Niu and Q. Wang, Zinc Oxide Nanoparticles Interplay With Physiological and Biochemical Attributes in Terminal Heat Stress Alleviation in Mungbean (*Vigna radiata* L.), *Front Plant Sci*, 2022, **13**, 842349.



4. N. E. Mahmoud and R. M. Abdelhameed, Use of titanium dioxide doped multi-wall carbon nanotubes as promoter for the growth, endogenous indices of *Sesamum indicum* L. under heat stress conditions, *Plant Physiology and Biochemistry*, 2023, **201**, 107844.
5. N. I. Elsheery, V. S. J. Sunoj, Y. Wen, J. J. Zhu, G. Muralidharan and K. F. Cao, Foliar application of nanoparticles mitigates the chilling effect on photosynthesis and photoprotection in sugarcane, *Plant Physiology and Biochemistry*, 2020, **149**, 50–60.
6. S. Amini, R. Maali-Amiri, R. Mohammadi and S. S. Kazemi- Shahandashti, cDNA-AFLP analysis of transcripts induced in chickpea plants by TiO<sub>2</sub> nanoparticles during cold stress, *Plant Physiology and Biochemistry*, 2017, **111**, 39–49.
7. V. Kardavan Ghabel and R. Karamian, Effects of TiO<sub>2</sub> nanoparticles and spermine on antioxidant responses of *Glycyrrhiza glabra* L. To cold stress, *Acta Bot Croat*, 2020, **79**, 137–147.
8. Y. Ye, K. Cota-Ruiz, J. A. Hernández-Viezcas, C. Valdés, I. A. Medina-Velo, R. S. Turley, J. R. Peralta-Videa and J. L. Gardea-Torresdey, Manganese Nanoparticles Control Salinity-Modulated Molecular Responses in *Capsicum annum* L. Through Priming: A Sustainable Approach for Agriculture, *ACS Sustain Chem Eng*, 2020, **8**, 1427–1436.
9. S. M. Zahedi, M. Abdelrahman, M. S. Hosseini, N. F. Hoveizeh and L. S. P. Tran, Alleviation of the effect of salinity on growth and yield of strawberry by foliar spray of selenium-nanoparticles, *Environmental Pollution*, 2019, **253**, 246–258.
10. M. C. Martínez-Ballesta, L. Zapata, N. Chalbi and M. Carvajal, Multiwalled carbon nanotubes enter broccoli cells enhancing growth and water uptake of plants exposed to salinity, *J Nanobiotechnology*, 2016, **14**, 42.
11. G. Zhao, Y. Zhao, W. Lou, J. Su, S. Wei, X. Yang, R. Wang, R. Guan, H. Pu and W. Shen, Nitrate reductase-dependent nitric oxide is crucial for multi-walled carbon nanotube-induced plant tolerance against salinity, *Nanoscale*, 2019, **11**, 10511–10523.
12. G. Gohari, F. Safai, S. Panahirad, A. Akbari, F. Rasouli, M. R. Dadpour and V. Fotopoulos, Modified multiwall carbon nanotubes display either phytotoxic or growth promoting and stress protecting activity in *Ocimum basilicum* L. in a concentration-dependent manner, *Chemosphere*, 2020, **249**, 126171.
13. J. An, P. Hu, F. Li, H. Wu, Y. Shen, J. C. White, X. Tian, Z. Li and J. P. Giraldo, Emerging investigator series: molecular mechanisms of plant salinity stress tolerance improvement by seed priming with cerium oxide nanoparticles, *Environ Sci Nano*, 2020, **7**, 2214–2228.
14. N. I. Elsheery, M. N. Helaly, H. M. El-Hoseiny and S. M. Alam-Eldein, Zinc oxide and silicone nanoparticles to improve the resistance mechanism and annual productivity of salt-stressed mango trees, *Agronomy*, 2020, **10**, 558.
15. H. Moradbeygi, R. Jamei, R. Heidari and R. Darvishzadeh, Investigating the enzymatic and non-enzymatic antioxidant defense by applying iron oxide nanoparticles in *Dracocephalum moldavica* L. plant under salinity stress, *Sci Hort*, 2020, **272**, 109537.
16. N. M. Alabdallah and H. S. Alzahrani, The potential mitigation effect of ZnO nanoparticles on [*Abelmoschus esculentus* L. Moench] metabolism under salt stress conditions, *Saudi J Biol Sci*, 2020, **27**, 3132–3137.
17. K. Pandey, M. Anas, V. K. Hicks, M. J. Green and M. V. Khodakovskaya, Improvement of Commercially Valuable Traits of Industrial Crops by Application of Carbon-based Nanomaterials, *Sci Rep*, 2019, **9**, 19358.
18. G. M. Afridi, N. Ullah, S. Ullah, M. Nafees, A. Khan, R. Shahzad, R. Jawad, M. Adnan, K. Liu, M. T. Harrison, S. Saud, S. Hassan, M. H. Saleem, D. Shahwar, T. Nawaz, K. El-Kahtany and S. Fahad, Modulation of salt stress through application of citrate capped silver nanoparticles and indole acetic acid in maize, *Plant Physiology and Biochemistry*, 2023, **201**, 107914.
19. A. H. A. Abeer, A. A. AL-Huqail, S. Albalawi, S. A. Alghamdi, B. Ali, S. M. S. Alghanem, H. A. S. Al-Haithloul, A. Amro, S. A. Tammam and M. T. El-Mahdy, Calcium nanoparticles mitigate severe salt stress in *Solanum lycopersicon* by instigating the antioxidant defense system and renovating the protein profile, *South African Journal of Botany*, 2023, **161**, 36–52.

20. I. M. Abu Zeid, F. H. Mohamed and E. M. R. Metwali, Responses of two strawberry cultivars to NaCl-induced salt stress under the influence of ZnO nanoparticles, *Saudi J Biol Sci*, 2023, **30**, 103623.
21. S. Hanif, A. Sajjad, R. Javed, A. Mannan and M. Zia, Proline doped ZnO nanocomposite alleviates NaCl induced adverse effects on morpho-biochemical response in Coriandrum sativum, *Plant Stress*, 2023, **9**, 100173.
22. S. Hanif and M. Zia, Glycine betaine capped ZnO NPs eliminate oxidative stress to coriander plants grown under NaCl presence, *Plant Physiology and Biochemistry*, 2023, **197**, 107651.
23. U. Ijaz, T. Ahmed, M. Rizwan, M. Noman, A. A. Shah, F. Azeem, H. F. Alharby, A. A. Bamagoos, B. M. Alharbi and S. Ali, Rice straw based silicon nanoparticles improve morphological and nutrient profile of rice plants under salinity stress by triggering physiological and genetic repair mechanisms, *Plant Physiology and Biochemistry*, 2023, **201**, 107788.
24. A. Rizwan, M. Zia-ur-Rehman, M. Rizwan, M. Usman, S. Anayatullah, Areej, H. F. Alharby, A. A. Bamagoos, B. M. Alharbi and S. Ali, Effects of silicon nanoparticles and conventional Si amendments on growth and nutrient accumulation by maize (*Zea mays* L.) grown in saline-sodic soil, *Environ Res*, 2023, **227**, 115740.
25. F. Shiri, M. A. Aazami, M. B. Hassanpouraghdam, F. Rasouli, K. Kakaei and M. Asadi, Cerium oxide- salicylic acid nanocomposite foliar use impacts physiological responses and essential oil composition of spearmint (*Mentha spicata* L.) under salt stress, *Sci Horti*, 2023, **317**, 112050.
26. M. Sheikhalipour, S. A. Mohammadi, B. Esmailpour, A. Spanos, R. Mahmoudi, G. R. Mahdavinia, M. H. Milani, A. Kahnemoie, M. Nouraein, C. Antoniou, M. Kulak, G. Gohari and V. Fotopoulos, Seedling nanopriming with selenium-chitosan nanoparticles mitigates the adverse effects of salt stress by inducing multiple defence pathways in bitter melon plants, *Int J Biol Macromol*, 2023, **242**, 124923.
27. S. M. Zahedi, M. Abolhassani, M. Hadian-Deljou, H. Feyzi, A. Akbari, F. Rasouli, M. Z. Koçak, M. Kulak and G. Gohari, Proline-functionalized graphene oxide nanoparticles (GO-Pro NPs): A new engineered nanoparticle to ameliorate salinity stress on grape (*Vitis vinifera* L. cv Sultana), *Plant Stress*, 2023, **7**, 100128.
28. P. Ashkavand, M. Tabari, M. Zarafshar, I. Tomášková and D. Struve, Effect of SiO<sub>2</sub> nanoparticles on drought resistance in hawthorn seedlings, *Forest Research Papers*, 2015, **76**, 350–359.
29. M. Hatami, J. Hadian and M. Ghorbanpour, Mechanisms underlying toxicity and stimulatory role of single-walled carbon nanotubes in *Hyoscyamus niger* during drought stress simulated by polyethylene glycol, *J Hazard Mater*, 2017, **324**, 306–320.
30. N. M. Silveira, A. B. Seabra, F. C. C. Marcos, M. T. Pelegrino, E. C. Machado and R. V. Ribeiro, Encapsulation of S-nitrosoglutathione into chitosan nanoparticles improves drought tolerance of sugarcane plants, *Nitric Oxide*, 2019, **84**, 38–44.
31. J. Faraji and A. Sepehri, Exogenous Nitric Oxide Improves the Protective Effects of TiO<sub>2</sub> Nanoparticles on Growth, Antioxidant System, and Photosynthetic Performance of Wheat Seedlings Under Drought Stress, *J Soil Sci Plant Nutr*, 2020, **20**, 703–714.
32. E. F. Ali, A. M. El-Shehawi, O. H. M. Ibrahim, E. Y. Abdul-Hafeez, M. M. Moussa and F. A. S. Hassan, A vital role of chitosan nanoparticles in improvisation the drought stress tolerance in *Catharanthus roseus* (L.) through biochemical and gene expression modulation, *Plant Physiology and Biochemistry*, 2021, **161**, 166–175.
33. S. S. Bidabadi, P. Sabbatini and J. VanderWeide, Iron oxide (Fe<sub>2</sub>O<sub>3</sub>) nanoparticles alleviate PEG-simulated drought stress in grape (*Vitis vinifera* L.) plants by regulating leaf antioxidants, *Sci Horti*, 2023, **312**, 111847.
34. A. Rehman, J. Weng, P. Li, I. H. Shah, S. ur Rahman, M. Khalid, M. A. Manzoor, L. Chang and Q. Niu, Green synthesized zinc oxide nanoparticles confer drought tolerance in melon (*Cucumis melo* L.), *Environ Exp Bot*, 2023, **212**, 105384.

35. S. M. Zahedi, M. S. Hosseini, N. Fahadi Hoveizeh, S. Kadkhodaei and M. Vaculík, Comparative morphological, physiological and molecular analyses of drought-stressed strawberry plants affected by SiO<sub>2</sub> and SiO<sub>2</sub>-NPs foliar spray, *Sci Horti*, 2023, **309**, 111686.
36. N. Rezvani, A. Sorooshzadeh and N. Farhadi, Effect of Nano-Silver on Growth of Saffron in Flooding Stress, Effect of Nano-Silver on Growth of Saffron in Flooding Stress, 2012.
37. G. Mustafa, K. Sakata and S. Komatsu, Proteomic analysis of flooded soybean root exposed to aluminum oxide nanoparticles, *J Proteomics*, 2015, **128**, 280–297.
38. G. Mustafa, K. Sakata and S. Komatsu, Proteomic analysis of soybean root exposed to varying sizes of silver nanoparticles under flooding stress, *J Proteomics*, 2016, **148**, 113–125.
39. T. Hashimoto, G. Mustafa, T. Nishiuchi and S. Komatsu, Comparative analysis of the effect of inorganic and organic chemicals with silver nanoparticles on soybean under flooding stress, *Int J Mol Sci*, 2020, **21**, 1300.
40. M. Hussain, S. Iqbal, M. Shafiq, R. M. Balal, J. Chater, D. Kadyampakeni, F. Alferez, A. Sarkhosh and M. A. Shahid, Silicon-induced hypoxia tolerance in citrus rootstocks associated with modulation in polyamine metabolism, *Sci Horti*, 2023, **318**, 112118.
41. D. K. Tripathi, S. Singh, V. P. Singh, S. M. Prasad, N. K. Dubey and D. K. Chauhan, Silicon nanoparticles more effectively alleviated UV-B stress than silicon in wheat (*Triticum aestivum*) seedlings, *Plant Physiology and Biochemistry*, 2017, **110**, 70–81.
42. M. Moradi Rikabad, L. Pourakbar, S. Siavash Moghaddam and J. Popović-Djordjević, Agrobiological, chemical and antioxidant properties of saffron (*Crocus sativus* L.) exposed to TiO<sub>2</sub> nanoparticles and ultraviolet-B stress, *Ind Crops Prod*, 2019, **137**, 137–143.
43. M. Azadi, S. Siavash Moghaddam, A. Rahimi, L. Pourakbar and J. Popović-Djordjević, Biosynthesized silver nanoparticles ameliorate yield, leaf photosynthetic pigments, and essential oil composition of garden thyme (*Thymus vulgaris* L.) exposed to UV-B stress, *J Environ Chem Eng*, 2021, **9**, 105919.
44. A. Hussain, S. Ali, M. Rizwan, M. Zia ur Rehman, M. R. Javed, M. Imran, S. A. S. Chatha and R. Nazir, Zinc oxide nanoparticles alter the wheat physiological response and reduce the cadmium uptake by plants, *Environmental Pollution*, 2018, **242**, 1518–1526.
45. A. Hussain, S. Ali, M. Rizwan, M. Z. ur Rehman, M. F. Qayyum, H. Wang and J. Rinklebe, Responses of wheat (*Triticum aestivum*) plants grown in a Cd contaminated soil to the application of iron oxide nanoparticles, *Ecotoxicol Environ Saf*, 2019, **173**, 156–164.
46. J. Chandra, R. Chauhan, J. Korram, M. L. Satnami and S. Keshavkant, Silica nanoparticle minimizes aluminium imposed injuries by impeding cytotoxic agents and over expressing protective genes in *Cicer arietinum*, *Sci Horti*, 2020, **260**, 108885.
47. J. Lian, L. Zhao, J. Wu, H. Xiong, Y. Bao, A. Zeb, J. Tang and W. Liu, Foliar spray of TiO<sub>2</sub> nanoparticles prevails over root application in reducing Cd accumulation and mitigating Cd-induced phytotoxicity in maize (*Zea mays* L.), *Chemosphere*, 2020, **239**, 124794.
48. M. Rizwan, S. Ali, M. Zia ur Rehman, M. Adrees, M. Arshad, M. F. Qayyum, L. Ali, A. Hussain, S. A. S. Chatha and M. Imran, Alleviation of cadmium accumulation in maize (*Zea mays* L.) by foliar spray of zinc oxide nanoparticles and biochar to contaminated soil, *Environmental Pollution*, 2019, **248**, 358–367.
49. F. Ghouri, M. J. Shahid, J. Liu, M. Lai, L. Sun, J. Wu, X. Liu, S. Ali and M. Q. Shahid, Polyploidy and zinc oxide nanoparticles alleviated Cd toxicity in rice by modulating oxidative stress and expression levels of sucrose and metal-transporter genes, *J Hazard Mater*, 2023, **448**, 130991.
50. R. A. A. Khan, S. S. Alam, S. Najeeb, A. Ali, A. Ahmad, A. Shakoor and L. Tong, Mitigating Cd and bacterial wilt stress in tomato plants through trico-synthesized silicon nanoparticles and *Trichoderma* metabolites, *Environmental Pollution*, 2023, **333**, 122041.
51. C. O. Ogunkunle, G. Y. Balogun, O. A. Olatunji, Z. Han, A. S. Adeleye, A. A. Awe and P. O. Fatoba, Foliar application of nanoceria attenuated cadmium stress in okra (*Abelmoschus esculentus* L.), *J Hazard Mater*, 2023, **445**, 130567.

52. S. Panahirad, M. Dadpour, G. Gohari, A. Akbari, G. Mahdavinia, H. Jafari, M. Kulak, R. Alcázar and V. Fotopoulos, Putrescine-functionalized carbon quantum dot (put-CQD) nanoparticle: A promising stress-protecting agent against cadmium stress in grapevine (*Vitis vinifera* cv. Sultana), *Plant Physiology and Biochemistry*, 2023, **197**,107653.
53. Y. Tanveer, S. Jahangir, Z. A. Shah, H. Yasmin, A. Nosheen, M. N. Hassan, N. Illyas, A. Bajguz, M. A. El-Sheikh and P. Ahmad, Zinc oxide nanoparticles mediated biostimulant impact on cadmium detoxification and in silico analysis of zinc oxide-cadmium networks in *Zea mays* L. regulome, *Environmental Pollution*, 2023, **316**,120641.
54. Z. Ulhassan, S. Yang, D. He, A. R. Khan, A. Salam, W. Azhar, S. Muhammad, S. Ali, Y. Hamid, I. Khan, M. S. Sheteiwy and W. Zhou, Seed priming with nano-silica effectively ameliorates chromium toxicity in *Brassica napus*, *J Hazard Mater*, DOI:10.1016/j.jhazmat.2023.131906.
55. Z. Zou, Y. Cheng, M. Shen, Y. Zhou, Y. Wang, J. Li, M. Qi and Z. Dai, Effect and mechanism of nano iron oxide on muskmelon under cadmium stress, *South African Journal of Botany*, 2023, **157**, 82–90.
56. M. Rizwan, S. Ali, M. Z. ur Rehman, S. Malik, M. Adrees, M. F. Qayyum, S. A. Alamri, M. N. Alyemeni and P. Ahmad, Effect of foliar applications of silicon and titanium dioxide nanoparticles on growth, oxidative stress, and cadmium accumulation by rice (*Oryza sativa*), *Acta Physiol Plant*, 2019, **41**, 35.
57. H. Yuan, Q. Liu, Z. Guo, J. Fu, Y. Sun, C. Gu, B. Xing and O. P. Dhankher, Sulfur nanoparticles improved plant growth and reduced mercury toxicity via mitigating the oxidative stress in *Brassica napus* L., *J Clean Prod*, 2021, **318**, 128589.
58. S. Banerjee, J. Islam, S. Mondal, A. Saha, B. Saha and A. Sen, Proactive attenuation of arsenic-stress by nano-priming: Zinc Oxide Nanoparticles in *Vigna mungo* (L.) Hepper trigger antioxidant defense response and reduce root-shoot arsenic translocation, *J Hazard Mater*, 2023, **446**, 130735.
59. L. Rossi, L. N. Fedenia, H. Sharifan, X. Ma and L. Lombardini, Effects of foliar application of zinc sulfate and zinc nanoparticles in coffee (*Coffea arabica* L.) plants, *Plant Physiology and Biochemistry*, 2019, **135**, 160–166.
60. W. Du, J. Yang, Q. Peng, X. Liang and H. Mao, Comparison study of zinc nanoparticles and zinc sulphate on wheat growth: From toxicity and zinc biofortification, *Chemosphere*, 2019, **227**, 109–116.
61. M. Li, P. Zhang, M. Adeel, Z. Guo, A. J. Chetwynd, C. Ma, T. Bai, Y. Hao and Y. Rui, Physiological impacts of zero valent iron, Fe<sub>3</sub>O<sub>4</sub> and Fe<sub>2</sub>O<sub>3</sub> nanoparticles in rice plants and their potential as Fe fertilizers, *Environmental Pollution*, 2020, **269**, 116134.
62. B. Sharma, M. Shrivastava, L. O. B. Afonso, U. Soni and D. M. Cahill, Zinc- and Magnesium-Doped Hydroxyapatite Nanoparticles Modified with Urea as Smart Nitrogen Fertilizers, *ACS Appl Nano Mater*, 2022, **5**, 7288–7299.
63. M. Kusiak, M. Sierocka, M. Świeca, S. Pasieczna-Patkowska, M. Sheteiwy and I. Joško, Unveiling of interactions between foliar-applied Cu nanoparticles and barley suffering from Cu deficiency, *Environmental Pollution*, 2023, **320**, 121044.
64. X. Li, H. Lu, K. Yang and L. Zhu, Attenuation of tetracyclines and related resistance genes in soil when exposed to nanoscale zero-valent iron, *J Hazard Mater*, 2023, **448**, 130867.
65. V. Picchi, S. Gobbi, M. Fattizzo, M. Zefelippo and F. Faoro, Chitosan nanoparticles loaded with n-acetyl cysteine to mitigate ozone and other possible oxidative stresses in durum wheat, *Plants*, 2021, **10**, 691.
66. R. Kannaujia, P. Singh, V. Prasad and V. Pandey, Evaluating impacts of biogenic silver nanoparticles and ethylenediurea on wheat (*Triticum aestivum* L.) against ozone-induced damages, *Environ Res*, 2022, **203**, 111857.
67. M. A. Ayub, H. R. Ahmad, M. Zia ur Rehman and E. A. Waraich, Cerium oxide nanoparticles alleviate stress in wheat grown on Cd contaminated alkaline soil, *Chemosphere*, 2023, **338**, 139561.

68. M. T. El-Saadony, E. S. M. Desoky, A. M. Saad, R. S. M. Eid, E. Selem and A. S. Elrys, Biological silicon nanoparticles improve *Phaseolus vulgaris* L. yield and minimize its contaminant contents on a heavy metals-contaminated saline soil, *J Environ Sci (China)*, 2021, **106**, 1–14.
69. M. Adrees, Z. S. Khan, S. Ali, M. Hafeez, S. Khalid, M. Z. ur Rehman, A. Hussain, K. Hussain, S. A. Shahid Chatha and M. Rizwan, Simultaneous mitigation of cadmium and drought stress in wheat by soil application of iron nanoparticles, *Chemosphere*, 2020, **238**, 124681.
70. J. Qiu, Y. Chen, Z. Liu, H. Wen, N. Jiang, H. Shi and Y. Kou, The application of zinc oxide nanoparticles: An effective strategy to protect rice from rice blast and abiotic stresses, *Environmental Pollution*, 2023, **331**, 121925.
71. J. G. Ramirez-Gil, A. A. Lopera and C. Garcia, Calcium phosphate nanoparticles improve growth parameters and mitigate stress associated with climatic variability in avocado fruit, *Heliyon*, 2023, **9**, e18658.
72. S. Chen, H. Liu, Z. Yangzong, J. L. Gardea-Torresdey, J. C. White and L. Zhao, Seed Priming with Reactive Oxygen Species-Generating Nanoparticles Enhanced Maize Tolerance to Multiple Abiotic Stresses, *Environ Sci Technol*, 2023, **57**, 19065-20452

**Table 2. Summary of different nanomaterials for mitigating biotic stress.**

| NM                                               | Conc.                                                                               | Apl.                   | Crop/s                 | Biotic stress | Effect/s                                                                                                              | Ref. |
|--------------------------------------------------|-------------------------------------------------------------------------------------|------------------------|------------------------|---------------|-----------------------------------------------------------------------------------------------------------------------|------|
| <b>Nanocapsule with loads Eucalyptus extract</b> | 0, 10, 15, 25, 35 & 50 mg/ml                                                        | Fumigation -           | -                      | Insects       | Mitigates damage caused by <i>Myzus persicae</i> .                                                                    | 1    |
| <b>CNAP-HMS-PDAAM</b>                            | 0, 30.0, 34.5, 39.0 & 69.0 g a.i./ha (field) 0, 25, 50, 100 & 200 mg/L (petri dish) | Foliar                 | <i>Oryza sativa</i> L. | Insects       | Efficient against <i>Cnaphalocrocis medinalis</i> & <i>Chilo suppressalis</i> , showed good biosafety.                | 2    |
| <b>THI@HMS @P(NIPAM-MAA)</b>                     | 0, 4, 8, 16 & 32mg/L                                                                | Foliar                 | <i>Oryza sativa</i> L. | Insects       | Improved efficacy against <i>Nilaparvata lugens</i> . Strong adhesion to leaves, & protection against UV-degradation. | 3    |
| <b>DNF@MIL-101@CMCS</b>                          | 3 g a.i./kg                                                                         | Pesticidal application | <i>Oryza sativa</i> L. | Insects       | Maintain insecticidal effect for longer period & improved plant growth.                                               | 4    |
| <b>TMX-loaded UIO-66-NH2/SL</b>                  | treatment & seeds mixed at mass ratio 1/200                                         | Seed                   | <i>Oryza sativa</i> L. | Insects       | Protect against planthopper.                                                                                          | 5    |
| <b>shRNA on CeO<sub>2</sub> Dextran-DEAE</b>     | 50, 100, 250 ng/μl                                                                  | Orally                 | -                      | Insects       | Increased mortality of <i>Euschistus heros</i> at ratio 0.7:1                                                         | 6    |

|                                                  |                                                                                                                                                      |               |                                 |                  |                                                                                                                                                                                       |    |
|--------------------------------------------------|------------------------------------------------------------------------------------------------------------------------------------------------------|---------------|---------------------------------|------------------|---------------------------------------------------------------------------------------------------------------------------------------------------------------------------------------|----|
| <b>Abam-PLA-Tannin-NS and Azox-PLA-Tannin-NS</b> | 0.78125, 1.625, 3.125, 6.25, 12.5, 25 & 50 ppm (Abam-PLA-Tannin-NS for aphids) 0.1, 0.5, 1, 5, 10 & 20 ppm (Azox-PLA-Tannin-NS for <i>Fusarium</i> ) | Foliar        | <i>Brassica oleracea</i> L.     | Insects & fungus | Improved adhesion to foliage, photostability, continuous release. Abam-PLA-Tannin-NS mitigation to <i>Myzus persicae</i> L. & Azox-PLA-Tannin-NS mitigation against <i>Fusarium</i> . | 7  |
| <b>GNPs</b>                                      | 0.1% w/v                                                                                                                                             | Foliar        | <i>Curcuma longa</i>            | Fungal           | Reduced rot incidence from <i>Pythium aphanidermatum</i> . Increased activity of defense enzymes of PO, PPO, & PI.                                                                    | 8  |
| <b>SiO<sub>2</sub></b>                           | 0, 5, 10 & 15 kg/ha                                                                                                                                  | Soil          | <i>Zea mays</i> L.              | Fungal           | Increase phenolic content & activate defense enzymes.                                                                                                                                 | 9  |
| <b>CeO<sub>2</sub></b>                           | 0, 50 & 250 mg/L                                                                                                                                     | Foliar & Soil | <i>Solanum lycopersicum</i>     | Fungal           | In foliar it decreased sugar content & increased fruit dry weight and Ca, P, & S. In soil, increased fruit K content, dry weight, & lycopene.                                         | 10 |
| <b>Chitosan</b>                                  | 0.1% (w/v)                                                                                                                                           | Foliar        | <i>Solanum lycopersicum</i> L.  | Fungal           | Decreased wilt disease symptoms. Increased yield & protection against <i>Fusarium oxysporum</i> f.sp. <i>lycopersici</i> .                                                            | 11 |
| <b>Chitosan</b>                                  | 2m of 0, 100, 500, 1000 & 5000 ppm                                                                                                                   | Solution      | <i>Triticum aestivum</i> L.     | Fungal           | Inhibited radial mycelial growth. Reduced colonies of <i>Fusarium graminearum</i> .                                                                                                   | 12 |
| <b>Chitosan</b>                                  | 5 ml/plant                                                                                                                                           | Spray         | <i>Eleusine coracana</i> Gaertn | Fungal           | Inhibited growth of <i>Pyricularia grisea</i> , delayed symptoms & induced ROS.                                                                                                       | 13 |

|                              |                                                                                                |                                                                                 |                                    |        |                                                                                                                      |    |
|------------------------------|------------------------------------------------------------------------------------------------|---------------------------------------------------------------------------------|------------------------------------|--------|----------------------------------------------------------------------------------------------------------------------|----|
| <b>H-CSNPs</b>               | Harpin <sub>ps</sub> with CSNPs (90% EE)                                                       | Foliar                                                                          | <i>Solanum lycopersicum</i> L.     | Fungal | Improved permeability, stability, & bioavailability of Harpin <sub>ps</sub> . Increased defense responses.           | 14 |
| <b>AZOX@MS<br/>Ns-PDA-Cu</b> | 0, 111, 222 & 333 mg/L AZOX concentration                                                      | Foliar & plate method                                                           | <i>Cucumis sativus</i>             | Fungal | Improved fungicidal activity against <i>Pyricularia oryzae</i> & <i>P. xanthii</i> .                                 | 15 |
| <b>Chitosan</b>              | 1 mg/mL                                                                                        | Seed pre-soaked, soil & foliar                                                  | <i>Oryza sativa</i> L. var. Jyothi | Fungal | Efficacy against <i>Rhizoctonia solani</i> . Increased defense enzyme activity.                                      | 16 |
| <b>PYR-HMS-<br/>HPC</b>      | 0, 0.02, 0.04, 0.08, 0.16 & 0.32 mg/L                                                          | Hyphal growth rate method                                                       | -                                  | Fungal | Fungicidal activity against <i>Magnaporthe oryzae</i> & less genotoxicity of pyraclostrobin.                         | 17 |
| <b>Pro@MSN-<br/>Pec</b>      | 45% (2g/L for leaves & roots) & (0.03125, 0.0625, 0.125, 0.25, 0.5 & 1 mg/L in petri dish)     | Leaves and roots (for extraction of Pro residues) & petri dish (against fungus) | <i>Oryza sativa</i> L.             | Fungal | Improved antifungal activity against <i>Magnaporthe oryzae</i> .                                                     | 18 |
| <b>Mycogenic<br/>ZnO</b>     | 261.136, 130.568, 65.284, 32.642, 16.321, 8.1605, 4.08, 2.04, 1.02, 0.51 µg/L (3 applications) | Petri dish & Foliar                                                             | <i>Solanum tuberosum</i> L.        | Fungal | Fungicidal effect against <i>Alternaria Solani</i> early blight & increased tuber production.                        | 19 |
| <b>Chitosan</b>              | 0.001% & 0.1% (petri dish) & 0.001% (foliar spray)                                             | Petri dish & Foliar                                                             | <i>Capsicum annuum</i> L.          | Fungal | Improved immunity against <i>Alternaria</i> leaf spot disease. Callose deposition was produced & reduced cell death. | 20 |



|                           |                                                 |                            |                                |                   |                                                                                                                                                                                         |    |
|---------------------------|-------------------------------------------------|----------------------------|--------------------------------|-------------------|-----------------------------------------------------------------------------------------------------------------------------------------------------------------------------------------|----|
| <b>CeO<sub>2</sub></b>    | 0, 50, 75 & 100 mg/L (two applications)         | Foliar                     | <i>Triticum aestivum L.</i>    | Fungal            | Effective against <i>Ustilago tritici</i> . Enhanced grain production, height, spike-length, & straw yield.                                                                             | 21 |
| <b>Ag</b>                 | 0, 0.01%, 0.02%, 0.03%, 0.04 & 0.05%            | Foliar                     | <i>Lycopersicum esculentum</i> | Fungal            | Effective against <i>Botrytis cinera</i> .                                                                                                                                              | 22 |
| <b>Ag</b>                 | 0 & 300 ppm                                     | Dipped in solution         | <i>Garcinia mangostana L.</i>  | Fungal            | Decrease disease index of fruit rot caused by <i>Lasiodiplodia theobromae</i> . Enhanced plant defense enzymes PAL, POD, CHI & GLU.                                                     | 23 |
| <b>Ag Chitosan</b>        | 1.6 mL                                          | Seed                       | <i>Tricum vulgare</i>          | Fungal            | Antifungal properties against <i>Fusarium oxysporum</i> , <i>Aspergillus niger</i> , <i>Aspergillus versicolor</i> , & <i>Aspergillus brasiliensis</i> , increased chlorophyll content. | 24 |
| <b>PYR@OxbrC D</b>        | 250 µg/mL                                       | in-vitro & foliar          | <i>Oryza sativa L.</i>         | Fungal            | Fungicidal activity against <i>Rhizoctonia solani</i> . Enhanced POD & CAT, & defense genes.                                                                                            | 25 |
| <b>ZnO</b>                | 0, 50 & 200 mg/L in Yoshida solution or sprayed | Hydroponic & sprayed       | <i>Oryza sativa L.</i>         | Fungal            | Reduced <i>Magnaporthe oryzae</i> & increased ROS accumulation acting against the fungal stress.                                                                                        | 26 |
| <b>Chitosan-magnesium</b> | 0, 25, 50 & 100 µg/mL                           | Agar well diffusion method | <i>Oryza sativa L.</i>         | Bacteria & fungal | Antimicrobial activity against bacteria <i>Acidovorax oryzae</i> & fungal <i>Rhizoctonia solani</i> .                                                                                   | 27 |

|                                      |                                                    |             |                                        |          |                                                                                                                                                                                                                                                                              |    |
|--------------------------------------|----------------------------------------------------|-------------|----------------------------------------|----------|------------------------------------------------------------------------------------------------------------------------------------------------------------------------------------------------------------------------------------------------------------------------------|----|
| <b>Ag</b>                            | 0, 10, 20, 30, 40, 50, 60, 70 & 80 µg/mL           | In-vitro    | -                                      | Bacteria | Antimicrobial effects against <i>Bacillus cereus</i> & <i>Pseudomonas syringae</i> pv. <i>syringae</i> & low toxicity against murine macrophages RAW2647.                                                                                                                    | 28 |
| <b>Chitosan</b>                      | 0, 100 & 200 µg/mL                                 | Foliar/soil | Potato and Tomato                      | Bacteria | Reduced disease severity in both plants against <i>Ralstonia solanacearum</i> .                                                                                                                                                                                              | 29 |
| <b>Chitosan</b>                      | 0, 10, 50, 100, 150, 200, 250 & 500 mL/100kg seeds | Seed        | <i>Solanum lycopersicum</i> L.         | Bacteria | Increased PAL, POX, PPO, CAT & GLU. Help in the defense against bacterial wilt disease ( <i>Ralstonia solanacearum</i> ).                                                                                                                                                    | 30 |
| <b>Si+TM</b>                         | 10 mL suspension at 2% & 3%                        | Root/Soil   | <i>Solanum lycopersicum</i> L.         | Bacteria | Reduced bacterial wilt disease & disrupted cellular morphology of <i>Ralstonia solanacearum</i> .                                                                                                                                                                            | 31 |
| <b>ZnO (pristine and sulfidized)</b> | 0, 100 & 500 mg/Kg                                 | Soil        | <i>Glycine max</i> , Zhonghuang No. 13 | Bacteria | Reduced bacterial alpha diversity in roots & nodules.                                                                                                                                                                                                                        | 32 |
| <b>Ch@BSNP</b>                       | 0, 5%, 10%, 15% & 20% of Ch@BSNP (60 µg/mL)        | Foliar      | <i>Solanum lycopersicum</i> L.         | Bacteria | Antibacterial effect against leaf spot disease caused by <i>Xanthomonas campestris</i> pv. <i>Vesicatoria</i> . Decrease anthocyanin, proline, flavonoids, lipid peroxidation, guaiacol peroxidase, ascorbate peroxidase, polyphenol oxidase, & phenylalanine ammonia-lyase. | 33 |

|                                                                 |                                     |                         |                                                                               |       |                                                                                                                                                                                                                |    |
|-----------------------------------------------------------------|-------------------------------------|-------------------------|-------------------------------------------------------------------------------|-------|----------------------------------------------------------------------------------------------------------------------------------------------------------------------------------------------------------------|----|
| <b>AuNR</b><br><b>(FOPPR</b><br><b>immunosens</b><br><b>or)</b> | -                                   | crude sap<br>extraction | <i>Phalaenopsis</i><br>sp.                                                    | Virus | Helps in the rapid quantitative analysis of viral infection diagnosis by recognizing <i>Cymbidium mosaic</i> & <i>Odontoglossum ringspot</i> .                                                                 | 34 |
| <b>NBCs</b>                                                     | 0, 150 & 200 $\mu$ M                | Foliar                  | <i>Vicia faba</i> L.                                                          | Virus | Reduced severity symptoms of <i>Bean yellow mosaic virus</i> .<br>Increased growth, photosynthetic pigment, enzymatic, non-enzymatic antioxidants, soluble protein, membrane stability index, & water content. | 35 |
| <b>Fe<sub>3</sub>O<sub>4</sub></b>                              | 100 $\mu$ g/mL daily<br>for 12 days | Foliar                  | <i>Nicotiana</i><br><i>benthamiana</i>                                        | Virus | Increased dry & fresh weight.<br>Activated plant antioxidants, & SA responsive PR related gene.<br>Showed plant resistance against <i>Tobacco mosaic virus</i> .                                               | 36 |
| <b>AuNP assay</b>                                               | 1 ng/ $\mu$ L to 1<br>ag/ $\mu$ L   | -                       | <i>Capsicum</i><br><i>annuum</i> L &<br><i>Solanum</i><br><i>lycopersicum</i> | Virus | Better screening detection than PCR test for <i>Begomovirus</i> .                                                                                                                                              | 37 |
| <b>ZnO</b>                                                      | 0 & 200 mM                          | Foliar                  | <i>Capsicum</i><br><i>annuum</i> L                                            | Virus | Decrease symptoms by <i>Pepper huasteco yellow vein virus</i> .<br>ZnONPs restricted the mobility of the virus, by increasing POD and SOD.                                                                     | 38 |

|                      |                                                                                                           |                        |                                                                                          |           |                                                                                                                                                                       |    |
|----------------------|-----------------------------------------------------------------------------------------------------------|------------------------|------------------------------------------------------------------------------------------|-----------|-----------------------------------------------------------------------------------------------------------------------------------------------------------------------|----|
| <b>BQX@PP@ S NPs</b> | 0 & 500 mg/L                                                                                              | Foliar                 | <i>Nicotiana glutinosa</i> , <i>N. benthamiana</i> , & <i>Nicotiana tabacum</i> cv. K326 | Virus     | Antiviral properties against <i>Tobacco mosaic virus</i> . Activated plant defense response & upregulated expression of SA & ABA genes. Increased fresh & dry weight. | 39 |
| <b>Ag</b>            | 0, 0.25, 0.50 & 1.0 mM (15 mL solution)                                                                   | Root/Soil              | <i>Solanum lycopersicum</i> L.                                                           | Nematodes | Improved plant growth, reduced infection, number of galls, egg masses & <i>Meloidogyne incognita</i> effects.                                                         | 40 |
| <b>AVM-CS/γ-PGA</b>  | 0, 0.0625, 0.125, 0.25, 0.5 & 1 ppm                                                                       | <i>in-vitro</i>        | -                                                                                        | Nematodes | Nematocidal properties against <i>Pine wood nematode</i> by increasing mortality by 98.6% in 24h.                                                                     | 41 |
| <b>Ag</b>            | 0, 0.15, 0.3, 0.6, 1.2 & 2.4 ml/L, v/v ( <i>in-vitro</i> ) & 0, 1, 2 & 3 ml/kg of soil ( <i>in-vivo</i> ) | <i>In-vitro</i> & Soil | <i>Vicia faba</i> L.                                                                     | Nematodes | Inhibited egg hatching of <i>Meloidogyne javanica in-vitro</i> . <i>In-vivo</i> reduced root galling & enhanced plant growth.                                         | 42 |
| <b>Et-AgNPs</b>      | 0, 100, 250, 500 & 1000 (ng/mL <i>in-vitro</i> ) & (ng/mL in 5 mL root)                                   | <i>in-vitro</i> & root | <i>Solanum lycopersicum</i> L.                                                           | Nematodes | <i>In-vitro</i> showed nematocidal properties, inhibition of egg hatching & mortality to juvenile <i>Meloidogyne incognita</i> .                                      | 43 |
| <b>Ag</b>            | 0, 5, 10, 15, 20, 25, 30, 40, 50, 60, 75, 80 & 100 ppm                                                    | embryogenesis study    | <i>Solanum nigrum</i> L.                                                                 | Nematodes | Nematocidal properties with applications 20 & 40 ppm in 24h & increase mortality against <i>Meloidogyne incognita</i> .                                               | 44 |

|                       |                                                       |                                  |                                |           |                                                                                                                                                                 |    |
|-----------------------|-------------------------------------------------------|----------------------------------|--------------------------------|-----------|-----------------------------------------------------------------------------------------------------------------------------------------------------------------|----|
| <b>Ag</b>             | 0, 25, 50 & 100 ppm                                   | Root/Soil                        | <i>Trachyspermum ammi</i> L.   | Nematodes | Mitigate stress induced by <i>Meloidogyne incognita</i> . Enhanced plant growth, & defense enzymes peroxidase, CAT, SOD, APX). Accumulated lignin in roots.     | 45 |
| <b>Ag</b>             | 0, 25, 50 & 100 µg/mL                                 | <i>in-vitro</i>                  | -                              | Nematodes | Biosynthesized Ag NPs showed a nematocidal properties after 48h by reducing egg hatching, larva movement & increase mortality of <i>Meloidogyne incognita</i> . | 46 |
| <b>Sg-ZnO Nrs</b>     | 0, 100, 200, 300, 400 & 500 µg/mL                     | <i>in-vitro</i> & seed treatment | <i>Solanum lycopersicum</i> L. | Nematodes | Increased seed germination & growth. Showed nematocidal properties against juvenile stage of <i>Meloidogyne incognita</i> .                                     | 47 |
| <b>THI@PAMA M@MSN</b> | 0, 50, 100 & 200 µg/mL (based on THI content in µg/g) | Spray application with drone     | <i>P. tabulaeformis</i>        | Nematodes | pH responsive release for 14d having nematocidal properties against <i>Bursaphelenchus xylophilus</i> .                                                         | 48 |
| <b>AVB1a NCs</b>      | 1.0 mg a.i./plant diluted with 200 mL of DI water     | Root                             | <i>Solanum lycopersicum</i> L. | Nematodes | Efficacy against <i>Meloidogyne incognita</i> . Improved permeability in root, soil mobility & shelf life. Reduced harm in other organisms.                     | 49 |
| <b>ZnO</b>            | 0 & 7.5 mg/L                                          | Solution application             | -                              | Nematodes | Decrease pathogen ( <i>Klebsiella pneumoniae</i> ) & their biofilm formation in <i>Caenorhabditis elegans</i> .                                                 | 50 |

|                                               |                                                                                                           |                            |                                                                                                                                       |       |                                                                                                                                                                                                    |    |
|-----------------------------------------------|-----------------------------------------------------------------------------------------------------------|----------------------------|---------------------------------------------------------------------------------------------------------------------------------------|-------|----------------------------------------------------------------------------------------------------------------------------------------------------------------------------------------------------|----|
| <b>SiO<sub>2</sub></b>                        | 5 mL of 0, 400, 2000 & 4000 mg/L (seeds) & 10 mL of 0, 400, 2000 & 4000 mg/L daily for 16 days (soil)     | Seed treated & soil        | <i>Zea mays</i> L.,<br><i>Phaseolus vulgaris</i> L.,<br><i>Hyssopus officinalis</i> L.,<br>& <i>Tarazacum officinale</i><br>F.H. Wigg | Weeds | Increase germination, yield, photosynthetic pigment, total protein, & amino acid, except in <i>Hyssopus officinalis</i> . Decrease total protein, total carbohydrates, & proline content in weeds. | 51 |
| <b>herbicide-loaded pectin nanoparticle s</b> | 200 mL solution & 0.05 g/L concentration                                                                  | Foliar application to weed | PBW 343, <i>Triticum aestivum</i>                                                                                                     | Weeds | Efficacy getting rid of weed ( <i>Chenopodium album</i> ) with less herbicide quantity.                                                                                                            | 52 |
| <b>Salt@MSN-TA</b>                            | 10 mL at concentration 0.6 kg/ha (petri dish) & 2.5 kg/ha (soil)                                          | petri dish & soil          | <i>Cucumis sativus</i> L. and <i>Triticum aestivum</i> L.                                                                             | Weeds | Delayed soil leaching, continued with herbicidal activity against targeted plant ( <i>Cucumis sativus</i> L.).                                                                                     | 53 |
| <b>LCHP</b>                                   | 0 & 210 mg in aqueous solution                                                                            | Foliar                     | -                                                                                                                                     | Weeds | Improved adhesion & effectiveness against weeds (Bermuda and Cogon). Light responsive controlled delivery of herbicide, & reduction of environment contamination.                                  | 54 |
| <b>MLH-MPP/CMC</b>                            | 5.0x10 <sup>-6</sup> M, 1.0x10 <sup>-5</sup> M & 8.0x10 <sup>-4</sup> M percentage loading of MPP (% w/w) | N/A                        | -                                                                                                                                     | Weeds | Improved prolongation & control of the release system of MPP.                                                                                                                                      | 55 |
| <b>Tribenuron-Methyl-Microemulsion</b>        | 15 g a.i./ha                                                                                              | Spray                      | <i>Triticum aestivum</i> L.                                                                                                           | Weeds | Herbicidal activity at low concentrations towards wheat weed ( <i>Convolvulus arvensis</i> ).                                                                                                      | 56 |

|                                                    |                                           |                  |                    |       |                                                                                                                                           |    |
|----------------------------------------------------|-------------------------------------------|------------------|--------------------|-------|-------------------------------------------------------------------------------------------------------------------------------------------|----|
| <b>2,4-D@HTIcs nanosheets</b>                      | 75, 150 & 300 mg/L of 2,4-D concentration | Suspension -     |                    | Weeds | Reduction of volatilization, delayed leaching through soil, & efficient against <i>Amaranthus retroflexus</i> weed.                       | 57 |
| <b>MOF@DIS-NH<sub>2</sub> and MOF@DIS-O-acetil</b> | 10, 30, 100, 300 & 1000 µM                | Water dispersion | -                  | Weeds | Phytotoxic against three types of weeds ( <i>Lolium rigidum</i> Gaudin, <i>Echinochloa crus-galli</i> L. & <i>Amaranthus viridis</i> L.). | 58 |
| <b>MCRH</b>                                        | 0.5 mg in 10 mL of water                  | Spray            | -                  | Weeds | Regulates release by magnetic field, same herbicidal as glyphosate against <i>tifdwarf bermudagrass</i> .                                 | 59 |
| <b>ZNP-ATZ</b>                                     | 0, 25 and 2000 g/ha                       | Soil application | <i>Zea mays</i> L. | Weeds | Reduced toxicity exposure in corn plants and showed toxicity against <i>Brassica juncea</i> ).                                            | 60 |

1. Z. Khoshraftar, A. A. Safekordi, A. Shamel and M. Zaefizadeh, Synthesis of natural nanopesticides with the origin of Eucalyptus globulus extract for pest control, *Green Chem Lett Rev*, 2019, **12**, 286–298.
2. Y. Gao, D. Li, D. Li, P. Xu, K. Mao, Y. Zhang, X. Qin, T. Tang, H. Wan, J. Li, M. Guo and S. He, Efficacy of an adhesive nanopesticide on insect pests of rice in field trials, *J Asia Pac Entomol*, 2020, **23**, 1222–1227.
3. Y. Gao, Y. Xiao, K. Mao, X. Qin, Y. Zhang, D. Li, Y. Zhang, J. Li, H. Wan and S. He, Thermoresponsive polymer-encapsulated hollow mesoporous silica nanoparticles and their application in insecticide delivery, *Chemical Engineering Journal*, 2020, **383**, 123169.
4. P. Feng, J. Chen, C. Fan, G. Huang, Y. Yu, J. Wu and B. Lin, An eco-friendly MIL-101@CMCS double-coated dinotefuran for long-acting active release and sustainable pest control, *J Clean Prod*, 2020, **265**, 121851.
5. G. Huang, Y. Deng, Y. Zhang, P. Feng, C. Xu, L. Fu and B. Lin, Study on long-term pest control and stability of double-layer pesticide carrier in indoor and outdoor environment, *Chemical Engineering Journal*, 2021, **403**, 126342.
6. J. Laisney, V. Loczenski Rose, K. Watters, K. V. Donohue and J. M. Unrine, Delivery of short hairpin RNA in the neotropical brown stink bug, *Euschistus heros*, using a composite nanomaterial, *Pestic Biochem Physiol*, 2021, **177**, 104906.
7. M. Yu, C. Sun, Y. Xue, C. Liu, D. Qiu, B. Cui, Y. Zhang, H. Cui and Z. Zeng, Tannic acid-based nanopesticides coating with highly improved foliage adhesion to enhance foliar retention, *RSC Adv*, 2019, **9**, 27096–27104.
8. S. Anusuya and M. Sathiyabama, Foliar application of β-d-glucan nanoparticles to control rhizome rot disease of turmeric, *Int J Biol Macromol*, 2015, **72**, 1205–1212.
9. R. Suriyaprabha, G. Karunakaran, K. Kavitha, R. Yuvakkumar, V. Rajendran and N. Kannan, Application of silica nanoparticles in maize to enhance fungal resistance, *IET Nanobiotechnol*, 2014, **8**, 133–137.

10. I. O. Adisa, S. Rawat, V. L. R. Pullagurala, C. O. Dimkpa, W. H. Elmer, J. C. White, J. A. Hernandez-Viezcas, J. R. Peralta-Videa and J. L. Gardea-Torresdey, Nutritional Status of Tomato (*Solanum lycopersicum*) Fruit Grown in Fusarium-Infested Soil: Impact of Cerium Oxide Nanoparticles, *J Agric Food Chem*, 2020, **68**, 1986–1997.
11. M. Sathiyabama and R. E. Charles, Fungal cell wall polymer-based nanoparticles in protection of tomato plants from wilt disease caused by *Fusarium oxysporum* f.sp. *lycopersici*, *Carbohydr Polym*, 2015, **133**, 400–407.
12. A. Kheiri, S. A. Moosawi Jorf, A. Mallhipour, H. Saremi and M. Nikkhah, Application of chitosan and chitosan nanoparticles for the control of *Fusarium head blight* of wheat (*Fusarium graminearum*) in vitro and greenhouse, *Int J Biol Macromol*, 2016, **93**, 1261–1272.
13. M. Sathiyabama and A. Manikandan, Chitosan nanoparticle induced defense responses in finger millet plants against blast disease caused by *Pyricularia grisea* (Cke.) Sacc., *Carbohydr Polym*, 2016, **154**, 241–246.
14. S. R. Nadendla, T. S. Rani, P. R. Vaikuntapu, R. R. Maddu and A. R. Podile, HarpinPss encapsulation in chitosan nanoparticles for improved bioavailability and disease resistance in tomato, *Carbohydr Polym*, 2018, **199**, 11–19.
15. C. Xu, Y. Shan, M. Bilal, B. Xu, L. Cao and Q. Huang, Copper ions chelated mesoporous silica nanoparticles via dopamine chemistry for controlled pesticide release regulated by coordination bonding, *Chemical Engineering Journal*, 2020, **395**, 125093.
16. K. Divya, M. Thampi, S. Vijayan, S. Varghese and M. S. Jisha, Induction of defence response in *Oryza sativa* L. against *Rhizoctonia solani* (Kuhn) by chitosan nanoparticles, *Microb Pathog*, 2020, **149**, 104525.
17. Y. Gao, Y. Liu, X. Qin, Z. Guo, D. Li, C. Li, H. Wan, F. Zhu, J. Li, Z. Zhang and S. He, Dual stimuli-responsive fungicide carrier based on hollow mesoporous silica/hydroxypropyl cellulose hybrid nanoparticles, *J Hazard Mater*, 2021, **414**, 125513.
18. T. M. Abdelrahman, X. Qin, D. Li, I. A. Senosy, M. Mmby, H. Wan, J. Li and S. He, Pectinase-responsive carriers based on mesoporous silica nanoparticles for improving the translocation and fungicidal activity of prochloraz in rice plants, *Chemical Engineering Journal*, 2020, **404**, 126440.
19. A. Singh, S. S. Gaurav, G. Shukla and P. Rani, Assessment of mycogenic zinc nano-fungicides against pathogenic early blight (*Alternaria solani*) of potato (*Solanum tuberosum* L.) *Materials Today: Proceedings*, Elsevier Ltd, 2022, vol. 49, pp. 3528–3537.
20. A. Sarkar, N. Chakraborty and K. Acharya, Chitosan nanoparticles mitigate *Alternaria* leaf spot disease of chilli in nitric oxide dependent way, *Plant Physiology and Biochemistry*, 2022, **180**, 64–73.
21. M. O. Alotaibi, N. M. Alotaibi, A. M. Ghoneim, N. ul Ain, M. A. Irshad, R. Nawaz, T. Abbas, A. Abbas, M. Rizwan and S. Ali, Effect of green synthesized cerium oxide nanoparticles on fungal disease of wheat plants: A field study, *Chemosphere*, 2023, **339**, 139731.
22. F. Anum, K. Jabeen, S. Javad, S. Iqbal, A. A. Shah, R. Casini and H. O. Elansary, Management of *Botrytis* Grey mold of tomato using bio-fabricated silver nanoparticles, *South African Journal of Botany*, 2023, **159**, 642–652.
23. N. Thammachote, K. Sripong, A. Uthairatanakij, N. Laohakunjit, S. Limmatvapirat, G. Ma, L. Zhang, M. Kato and P. Jitareerat, Influence of silver nanoparticles on postharvest disease, pericarp hardening, and quality of mangosteen, *Postharvest Biol Technol*, 2023, **204**, 112470.
24. M. Mondéjar-López, A. J. López-Jimenez, O. Ahrazem, L. Gómez-Gómez and E. Niza, Chitosan coated - biogenic silver nanoparticles from wheat residues as green antifungal and nanoprimum in wheat seeds, *Int J Biol Macromol*, 2023, **225**, 964–973.
25. N. Zhang, W. Hu, R. Hou, P. Du, X. Miao, R. Wang, H. Wu, S. Li, Y. Li, Z. Zhang and H. Xu, Enhanced fungicidal activity and mechanism of pyraclostrobin nanoparticle with reactive oxygen species responsiveness against *Rhizoctonia solani*, *J Clean Prod*, 2023, **421**, 138494.



26. J. Qiu, Y. Chen, Z. Liu, H. Wen, N. Jiang, H. Shi and Y. Kou, The application of zinc oxide nanoparticles: An effective strategy to protect rice from rice blast and abiotic stresses, *Environmental Pollution*, 2023, **331**,121925.
27. T. Ahmed, M. Noman, J. Luo, S. Muhammad, M. Shahid, M. A. Ali, M. Zhang and B. Li, Bioengineered chitosan-magnesium nanocomposite: A novel agricultural antimicrobial agent against *Acidovorax oryzae* and *Rhizoctonia solani* for sustainable rice production, *Int J Biol Macromol*, 2021, **168**, 834–845.
28. B. Gogoi, R. Kumar, J. Upadhyay and D. Borah, Facile biogenic synthesis of silver nanoparticles (AgNPs) by *Citrus grandis* (L.) Osbeck fruit extract with excellent antimicrobial potential against plant pathogens, *SN Appl Sci*, 2020, **2**, 1723.
29. A. M. Khairy, M. R. A. Tohamy, M. A. Zayed, S. F. Mahmoud, A. M. El-Tahan, M. T. El-Saadony and P. K. Mesiha, Eco-friendly application of nano-chitosan for controlling potato and tomato bacterial wilt, *Saudi J Biol Sci*, 2021, **29**, 2199–2209.
30. K. Narasimhamurthy, A. C. Udayashankar, S. De Britto, S. N. Lavanya, M. Abdelrahman, K. Soumya, H. S. Shetty, C. Srinivas and S. Jogaiah, Chitosan and chitosan-derived nanoparticles modulate enhanced immune response in tomato against bacterial wilt disease, *Int J Biol Macromol*, 2022, **220**, 223–237.
31. R. A. A. Khan, S. S. Alam, S. Najeeb, A. Ali, A. Ahmad, A. Shakoor and L. Tong, Mitigating Cd and bacterial wilt stress in tomato plants through trico-synthesized silicon nanoparticles and *Trichoderma* metabolites, *Environmental Pollution*, 2023, **333**, 122041.
32. C. Chen, L. L. Guo, Y. Chen, P. Qin and G. Wei, Pristine and sulfidized zinc oxide nanoparticles alter bacterial communities and metabolite profiles in soybean rhizocompartments, *Science of the Total Environment*, 2023, **855**, 158697.
33. V. P. Giri, S. Pandey, S. Srivastava, P. Shukla, N. Kumar, M. Kumari, R. Katiyar, S. Singh and A. Mishra, Chitosan fabricated biogenic silver nanoparticles (Ch@BSNP) protectively modulate the defense mechanism of tomato during bacterial leaf spot (BLS) disease, *Plant Physiology and Biochemistry*, 2023, **197**, 107637.
34. H. Y. Lin, C. H. Huang, S. H. Lu, I. T. Kuo and L. K. Chau, Direct detection of orchid viruses using nanorod-based fiber optic particle plasmon resonance immunosensor, *Biosens Bioelectron*, 2014, **51**, 371–378.
35. A. R. Sofy, A. A. Hmed, A. E. A. M. Alnaggar, R. A. Dawoud, R. F. M. Elshaarawy and M. R. Sofy, mitigating effects of Bean yellow mosaic virus infection in faba bean using new carboxymethyl chitosan-titania nanobiocomposites, *Int J Biol Macromol*, 2020, **163**, 1261–1275.
36. L. Cai, L. Cai, H. Jia, C. Liu, D. Wang and X. Sun, Foliar exposure of Fe<sub>3</sub>O<sub>4</sub> nanoparticles on *Nicotiana benthamiana*: Evidence for nanoparticles uptake, plant growth promoter and defense response elicitor against plant virus, *J Hazard Mater*, 2020, **393**, 22415.
37. L. Ramesh and A. Viswanathan, Detection of Begomovirus in chilli and tomato plants using functionalized gold nanoparticles, *Sci Rep*, 2021, **11**, 14203.
38. S. de J. Rivero-Montejo, R. F. Rivera-Bustamante, D. L. Saavedra-Trejo, M. Vargas-Hernandez, V. Palos-Barba, I. Macias-Bobadilla, R. G. Guevara-Gonzalez, E. M. Rivera-Muñoz and I. Torres-Pacheco, Inhibition of pepper huasteco yellow veins virus by foliar application of ZnO nanoparticles in *Capsicum annum* L, *Plant Physiology and Biochemistry*, 2023, **203**, 108074.
39. H. Xiang, J. Meng, W. Shao, D. Zeng, J. Ji, P. Wang, X. Zhou, P. Qi, L. Liu and S. Yang, Plant protein-based self-assembling core-shell nanocarrier for effectively controlling plant viruses: Evidence for nanoparticle delivery behavior, plant growth promotion, and plant resistance induction, *Chemical Engineering Journal*, DOI:10.1016/j.cej.2023.142432.
40. A. H. Nour El-Deen and B. A. El-Deeb, Effectiveness of Silver Nanoparticles against Root-Knot Nematode, *Meloidogyne incognita* Infecting Tomato under Greenhouse Conditions, *Journal of Agricultural Science*, 2018, **10**, 148.
41. W. Liang, A. Yu, G. Wang, F. Zheng, J. Jia and H. Xu, Chitosan-based nanoparticles of avermectin to control pine wood nematodes, *Int J Biol Macromol*, 2018, **112**, 258–263.

42. S. M. Hamed, E. S. Hagag and N. A. El-Raouf, Green production of silver nanoparticles, evaluation of their nematocidal activity against *Meloidogyne javanica* and their impact on growth of faba bean, *Beni Suef Univ J Basic Appl Sci*, 2019, **8**, DOI:10.1186/s43088-019-0010-3.
43. D. Kalaiselvi, A. Mohankumar, G. Shanmugam, S. Nivitha and P. Sundararaj, Green synthesis of silver nanoparticles using latex extract of *Euphorbia tirucalli*: A novel approach for the management of root knot nematode, *Meloidogyne incognita*, *Crop Protection*, 2019, **117**, 108–114.
44. M. M. G. Fouda, G. I. M. A., A. E. M. Hanfy, S. I. Othman, A. F. Zaitoun, N. R. Abdelsalam, A. A. Allam, O. M. Morsy and M. E. El-Naggar, Utilization of High throughput microcrystalline cellulose decorated silver nanoparticles as an eco-nematicide on root-knot nematodes, *Colloids Surf B Biointerfaces*, 2020, **188**, 110805.
45. M. Danish, M. Altaf, M. I. Robab, M. Shahid, S. Manoharadas, S. A. Hussain and H. Shaikh, Green Synthesized Silver Nanoparticles Mitigate Biotic Stress Induced by *Meloidogyne incognita* in *Trachyspermum ammi* (L.) by Improving Growth, Biochemical, and Antioxidant Enzyme Activities, *ACS Omega*, 2021, **6**, 11389–11403.
46. A. A. Heflish, A. E. Hanfy, M. J. Ansari, E. S. Dessoky, A. O. Attia, M. M. Elshaer, M. K. Gaber, A. Kordy, A. S. Doma, A. Abdelkhalek and S. I. Behiry, Green biosynthesized silver nanoparticles using *Acalypha wilkesiana* extract control root-knot nematode, *J King Saud Univ Sci*, 2021, **33**, 101516.
47. K. Duraisamy, M. Amirthalingam, T. Govindhan, J. C. Kim, K. Hasegawa and S. Palanisamy, Fabrication of zinc oxide nanorods using plant latex serum as a green matrix for the sustainable management of root-knot nematodes, *Mater Lett*, 2022, **317**, 32098.
48. W. Gan, X. Kong, J. Fang, X. Shi, S. Zhang, Y. Li, L. Qu, F. Liu, Z. Zhang, F. Zhang and X. Zhang, A pH-responsive fluorescent nanopesticide for selective delivery and visualization in pine wood nematode control, *Chemical Engineering Journal*, 2023, **463**, 142353.
49. S. Pan, M. Yu, Z. Sun, R. Zhao, Y. min Wang, X. lin Sun, X. yu Guo, Y. Xu and X. min Wu, Preparation of enzyme-responsive composite nanocapsules with sodium carboxymethyl cellulose to improve the control effect of root-knot nematode disease, *Int J Biol Macromol*, 2023, **241**, 124561.
50. J. C. Cochran, J. M. Unrine, M. Coyne and O. V. Tsyusko, Multiple stressor effects on a model soil nematode, *Caenorhabditis elegans*: Combined effects of the pathogen *Klebsiella pneumoniae* and zinc oxide nanoparticles, *Science of the Total Environment*, 2023, **865**, 161307.
51. J. Sharifi-Rad, M. Sharifi-Rad and J. A. Teixeira Da Silva, Exposed to SiO<sub>2</sub> Nanoparticles, *J. Arg. Sci. Tech.*, 2016, **18**, 1027-1040.
52. S. Kumar, G. Bhanjana, A. Sharma, N. Dilbaghi, M. C. Sidhu and K. H. Kim, Development of nanoformulation approaches for the control of weeds, *Science of the Total Environment*, 2017, **586**, 1272–1278.
53. L. Cao, Z. Zhou, S. Niu, C. Cao, X. Li, Y. Shan and Q. Huang, Positive-Charge Functionalized Mesoporous Silica Nanoparticles as Nanocarriers for Controlled 2,4-Dichlorophenoxy Acetic Acid Sodium Salt Release, *J Agric Food Chem*, 2018, **66**, 6594–6603.
54. C. Chen, G. Zhang, Z. Dai, Y. Xiang, B. Liu, P. Bian, K. Zheng, Z. Wu and D. Cai, Fabrication of light-responsively controlled-release herbicide using a nanocomposite, *Chemical Engineering Journal*, 2018, **349**, 101–110.
55. N. Hashim, N. S. Misuan, I. M. Isa, S. A. Bakar, S. Mustafar, M. Mamat, M. Z. Hussein and S. N. M. Sharif, Carboxymethylcellulose-coated magnesium-layered hydroxide nanocomposite for controlled release of 3-(4-methoxyphenyl)propionic acid, *Arabian Journal of Chemistry*, 2020, **13**, 3974–3987.
56. M. Heydari, A. R. Yousefi, A. Rahdar, N. Nikfarjam, K. Jamshidi, M. Bilal and P. Taboada, Microemulsions of tribenuron-methyl using Pluronic F127: Physico-chemical characterization and efficiency on wheat weed, *J Mol Liq*, 2021, **326**, 115263.

57. Y. Gao, Z. Zhou, X. Chen, Y. Tian, Y. Li, H. Wang, X. Li, X. Yu and Y. Cao, Controlled release of herbicides by 2,4-D-, MCPA-, and bromoxynil-intercalated hydrotalcite nanosheets, *Green Chemistry*, 2021, **23**, 4560–4566.
58. F. J. R. Mejias, S. Trasobares, R. M. Varela, J. M. G. Molinillo, J. J. Calvino and F. A. Macías, One-step encapsulation of ortho-disulfides in functionalized zinc MOF. Enabling metal–organic frameworks in agriculture, *ACS Appl Mater Interfaces*, 2021, **13**, 7997–8005.
59. Y. Chi, C. Chen, G. Zhang, Z. Ye, X. Su, X. Ren and Z. Wu, Fabrication of magnetic-responsive controlled-release herbicide by a palygorskite-based nanocomposite, *Colloids Surf B Biointerfaces*, 2021, **208**, 112115.
60. L. B. Carvalho, I. S. Godoy, A. C. Preisler, P. L. de Freitas Proença, T. Saraiva-Santos, W. A. Verri, H. C. Oliveira, G. Dalazen and L. F. Fraceto, Pre-emergence herbicidal efficiency and uptake of atrazine-loaded zein nanoparticles: a sustainable alternative to weed control, *Environ Sci Nano*, 2023, **10**, 1629–1643.
